# Supplementary material
Source: HighWire-hosted journal article supplement (https://cmaj.ca/highwire/filestream/80594/field_highwire_adjunct_files/0/202556-image-1-at.pdf)
Supplement: 202556-image-1-at.pdf [file 202556-image-1-at.pdf]

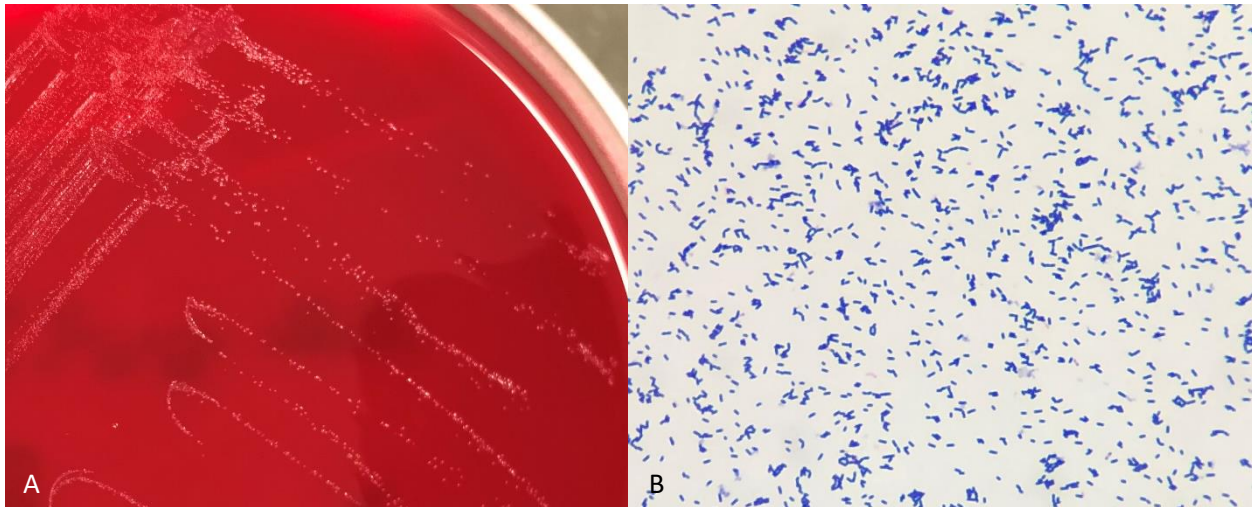

Appendix 1: (A) *Slackia exigua* growing on Brucella blood agar with vitamin K and hemin after 3 days of incubation in an anaerobic atmosphere. (B) Gram stain of *Slackia exigua*.
